# Supplementary material for: Direct and quantitative analysis of altered metabolic flux distributions and cellular ATP production pathway in fumarate hydratase-diminished cells
Source: PubMed Central journal article supplement (PMC7400513; doi:10.1038/s41598-020-70000-6), 2020-08-03
Supplement: 41598_2020_70000_MOESM1_ESM.pdf [file 41598_2020_70000_MOESM1_ESM.pdf]

**Direct and quantitative analysis of altered metabolic flux distributions and cellular ATP production pathway in fumarate hydratase-diminished cells**

**Shingo Noguchi<sup>1,2</sup>, Hirokazu Ishikawa<sup>3</sup>, Kenichi Wakita<sup>1</sup>, Fumio Matsuda<sup>2</sup> and Hiroshi Shimizu<sup>2,\*</sup>**

<sup>1</sup>Biomarker Department, Daiichi Sankyo Co., Ltd., Tokyo, Japan

<sup>2</sup>Department of Bioinformatic Engineering, Graduate School of Information Science and Technology, Osaka University, Osaka, Japan

<sup>3</sup>Biological Research Department, Daiichi Sankyo RD Novare Co., Ltd., Tokyo, Japan

\*Corresponding author: [shimizu@ist.osaka-u.ac.jp](mailto:shimizu@ist.osaka-u.ac.jp)

**Supplemental Figure S1.** Time-dependent change of MID in each metabolite labelled by [1,2-<sup>13</sup>C]glucose. Each data point and error bar represent the mean and standard deviation from triplicate samples.

**Supplemental Figure S2.** Time-dependent change of MID in each metabolite labelled by [U-<sup>13</sup>C]glutamine. Each data point and error bar represent the mean and standard deviation from triplicate samples.

**Supplemental Figure S3.** Full length images of western blotting. Red frame represents cropped regions in Figure 1c and Figure 1d in the main manuscript.

**Supplemental Table S1.** Determined metabolic flux distributions in parental and FH<sup>dim</sup> cells. LB, lower boundary; UB, upper boundary.

**Supplemental Table S2.** List of ions used for GC-MS measurement.

**Supplemental Table S3.** Measured and simulated MIDs for fitting analysis.

**Supplemental Table S4.** NADPH production and consumption flux.

**Supplemental Table S5.** NADH production and consumption flux.

**Supplemental Table S6.** ATP production and consumption flux.

## Supplemental Figure S1

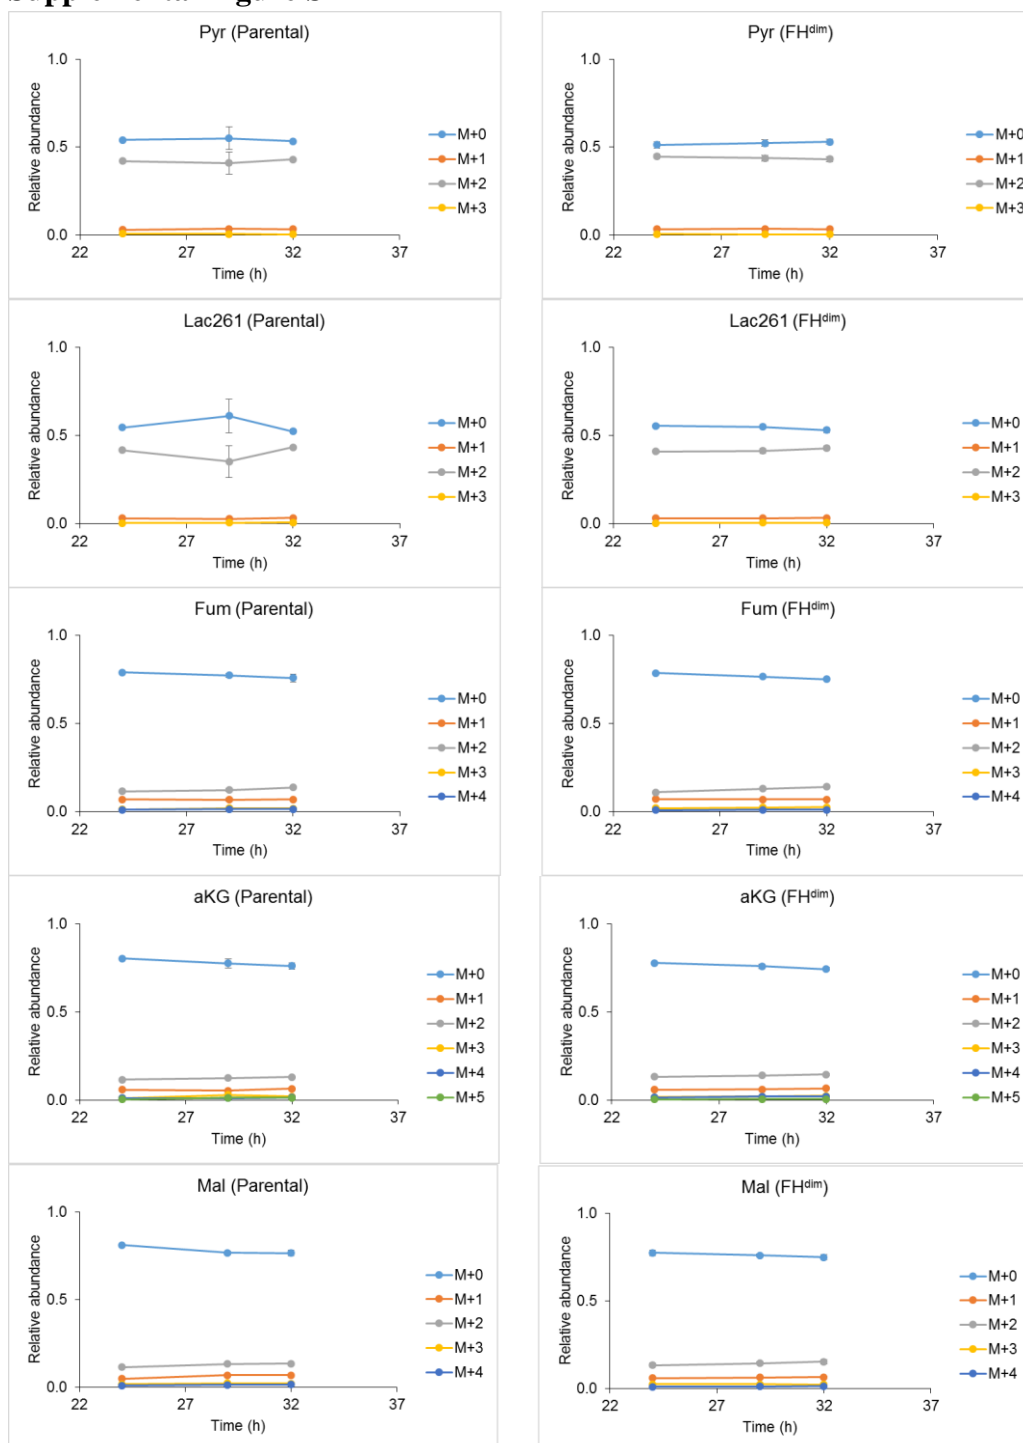

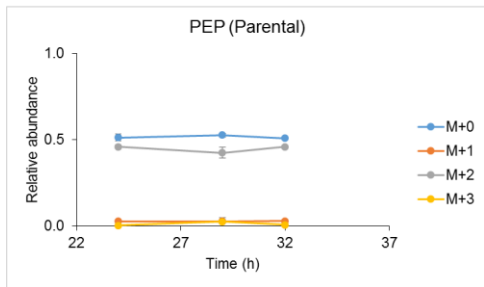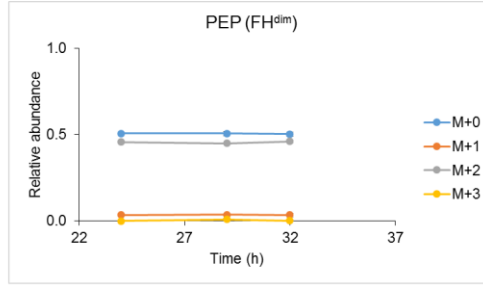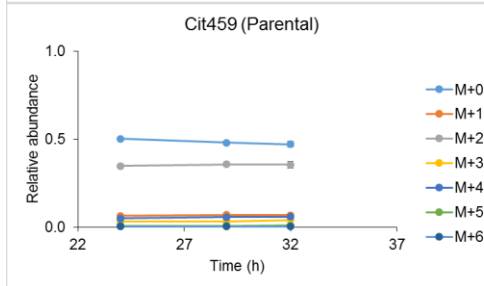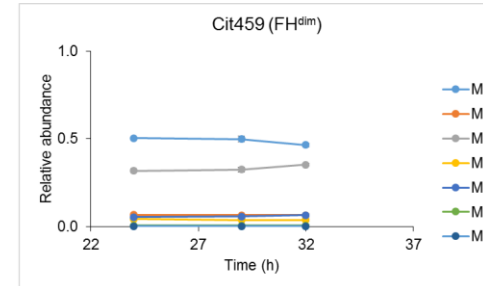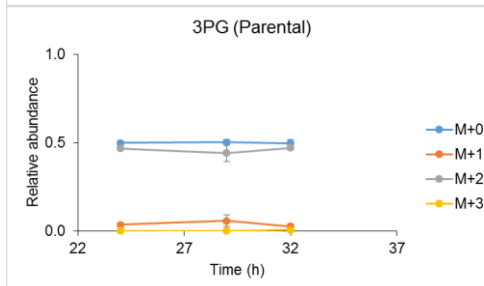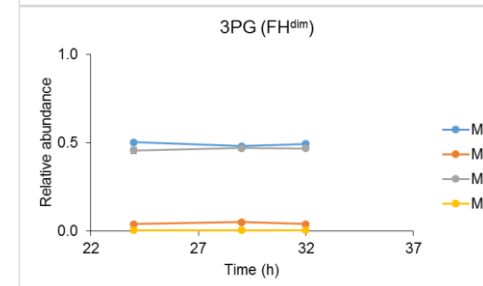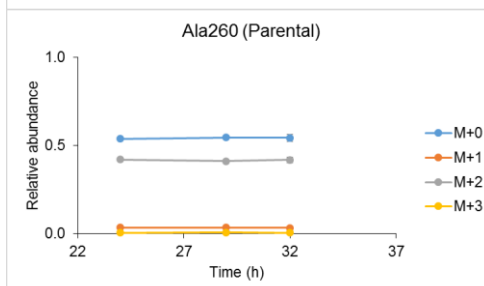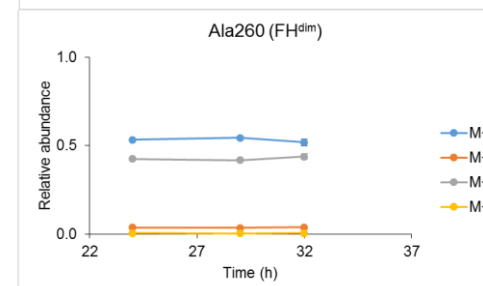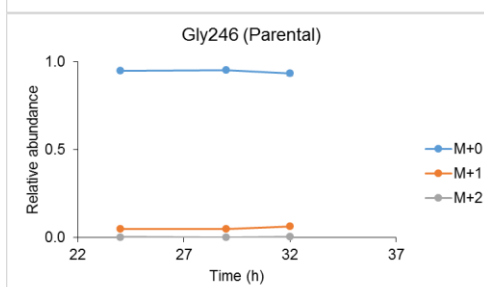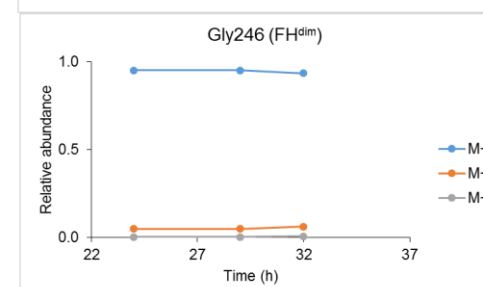

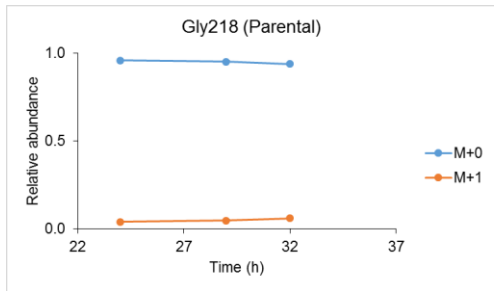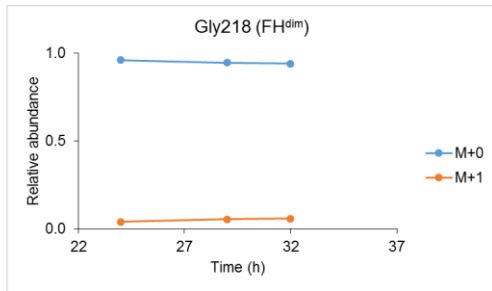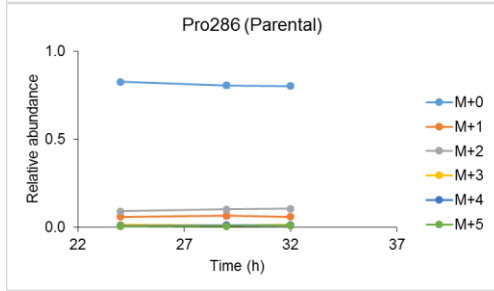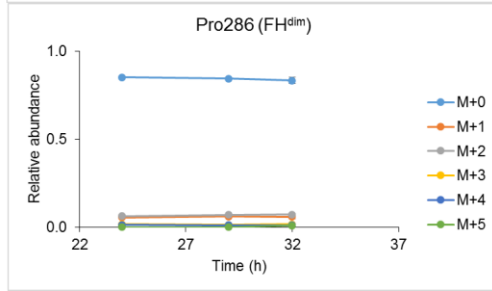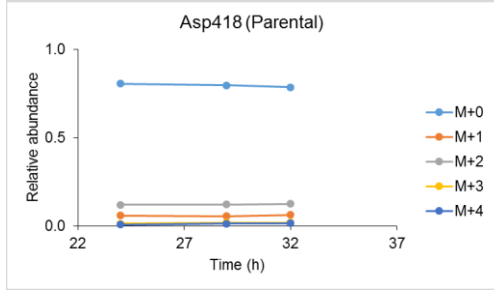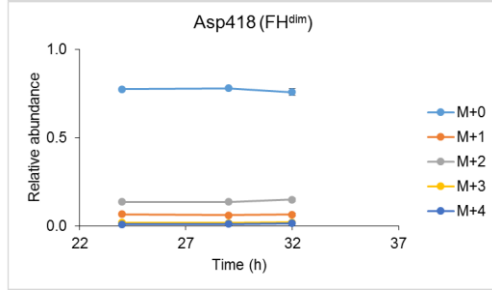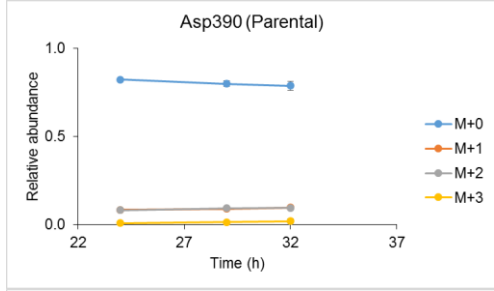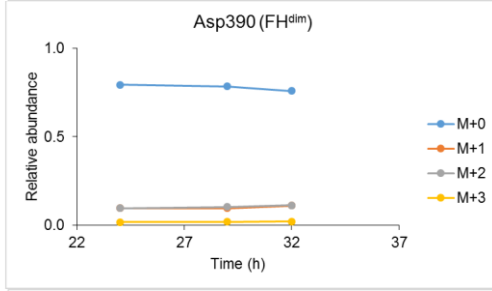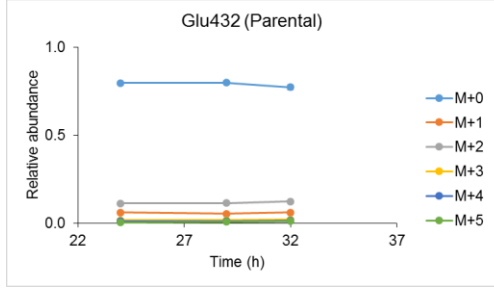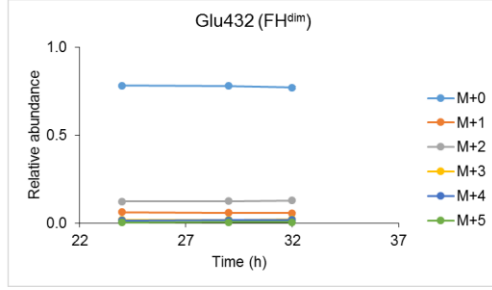

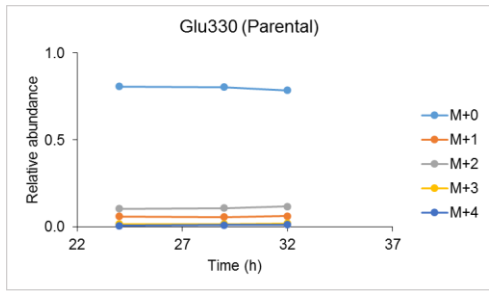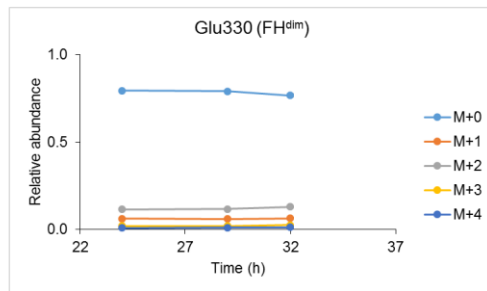



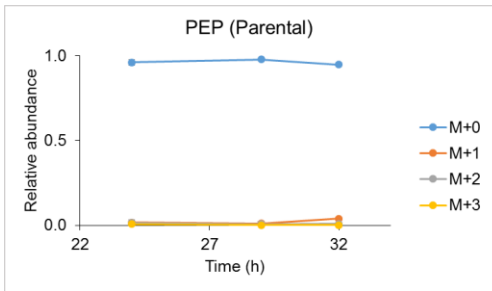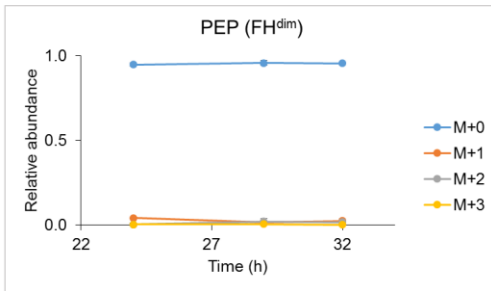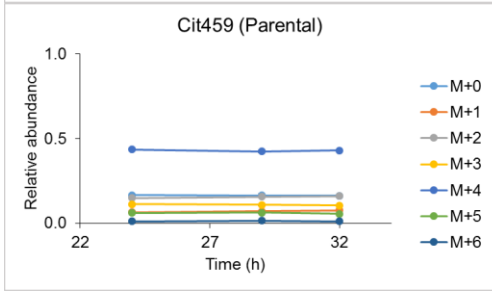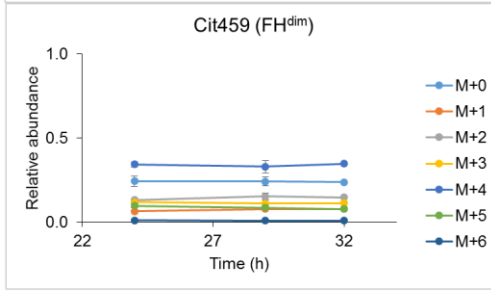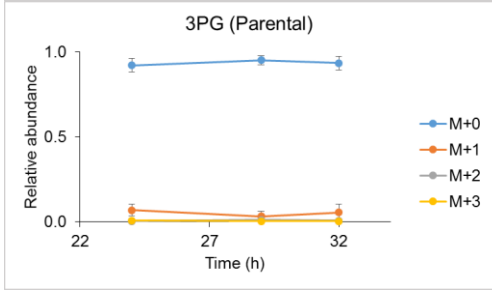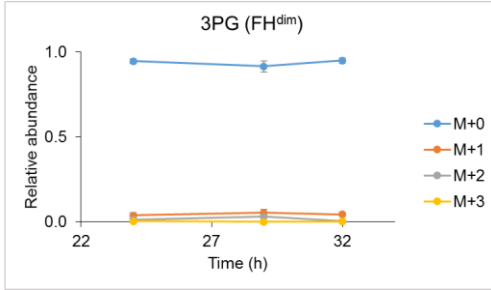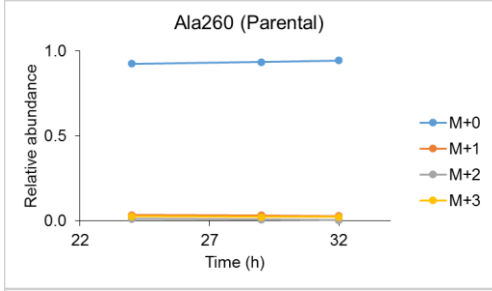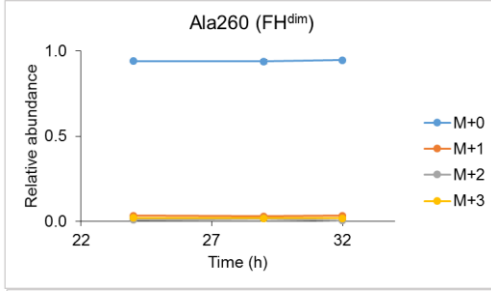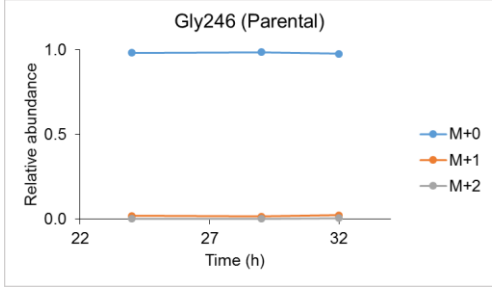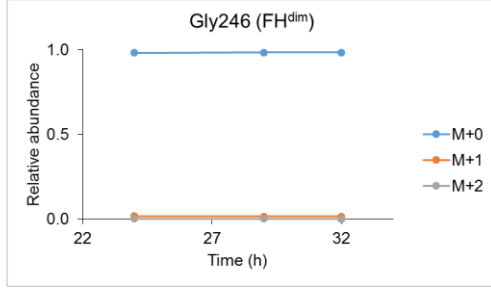



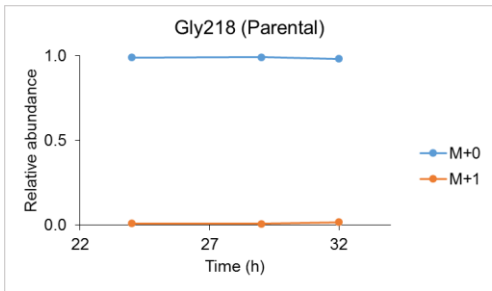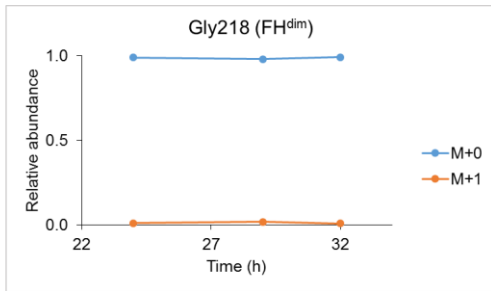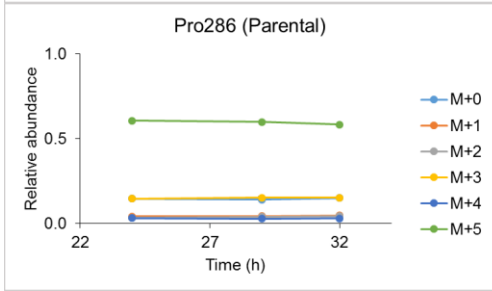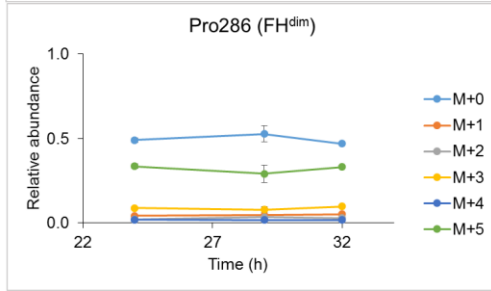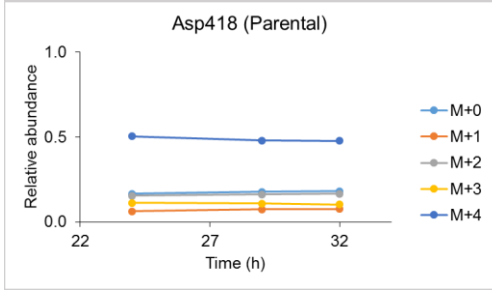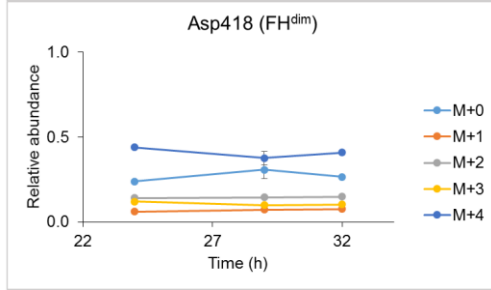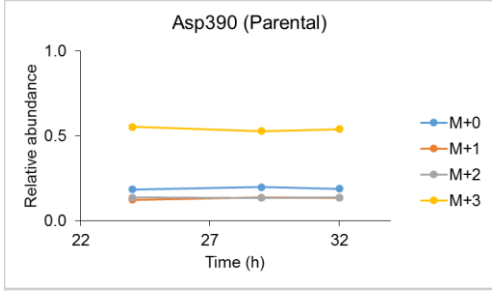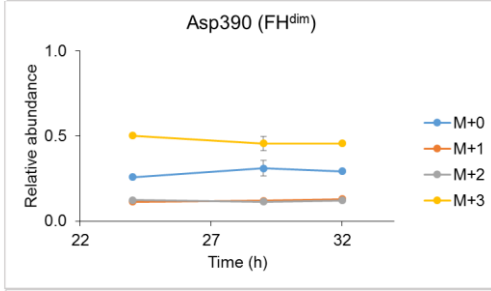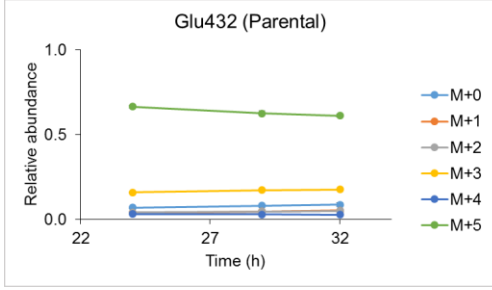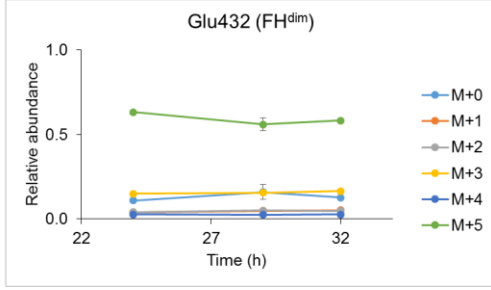

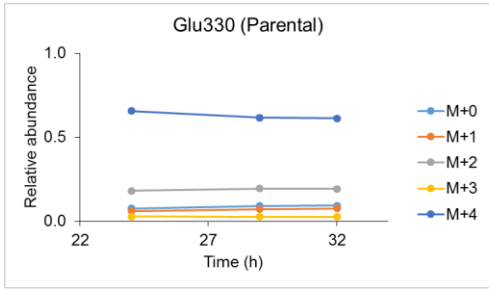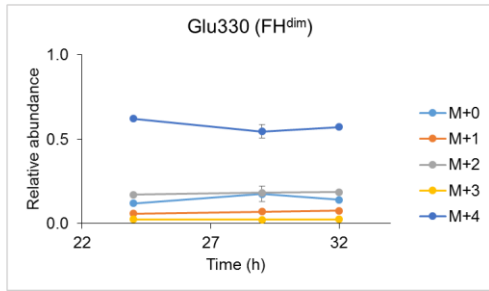

### Supplemental Figure S3

Figure 1c

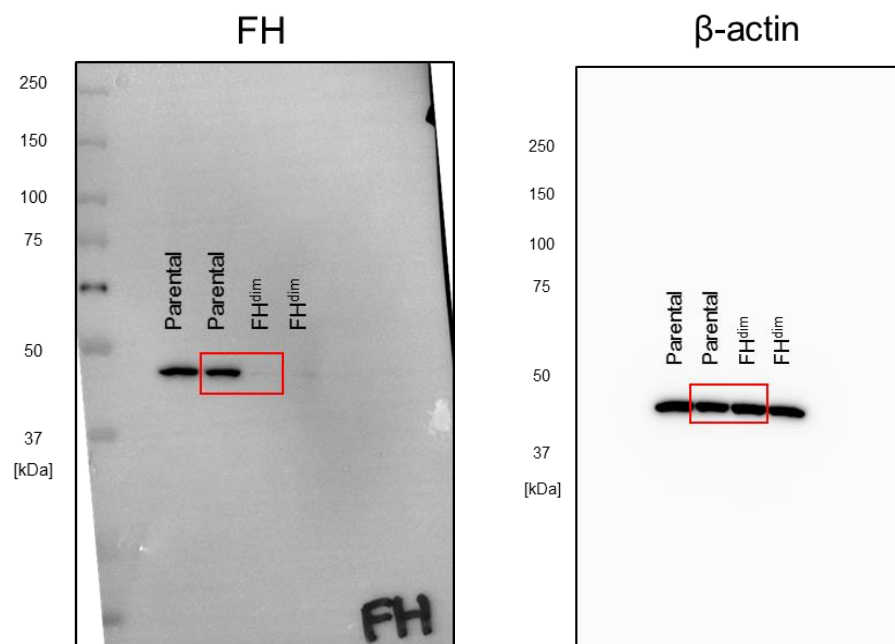

Figure 1d

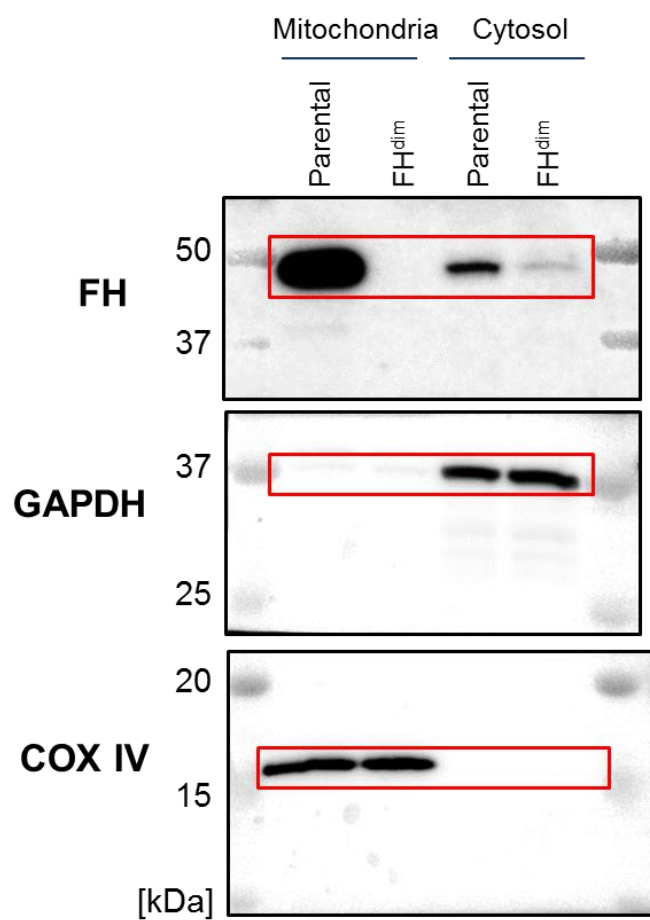

**Supplemental Table S1**

| Reaction ID    | Reaction                     | Parental [nmol/10 <sup>6</sup> cells/h] |        |        | FH <sup>dim</sup> [nmol/10 <sup>6</sup> cells/h] |       |        |
|----------------|------------------------------|-----------------------------------------|--------|--------|--------------------------------------------------|-------|--------|
|                |                              | Flux                                    | LB     | UB     | Flux                                             | LB    | UB     |
| SubsGlc        | SubsGlc-->G6P                | 607.5                                   | 539.7  | 686.4  | 558.6                                            | 504.1 | 633.6  |
| SubsArg        | SubsArg-->Arg                | 8.7                                     | -      | -      | 9.6                                              | -     | -      |
| SubsCys        | SubsCys-->Cys                | 4.1                                     | -      | -      | 3.3                                              | -     | -      |
| SubsGln        | SubsGln-->Gln                | 82.7                                    | -      | -      | 52.7                                             | -     | -      |
| SubsSer        | SubsSer-->Ser                | 22.0                                    | -      | -      | 16.2                                             | -     | -      |
| SubsCO2        | SubsCO2-->CO2in              | 8869.3                                  | -      | -      | 369186.6                                         | -     | -      |
| Lac_ex         | Lac-->LacEx                  | 1044.5                                  | 866.4  | 1206.7 | 983.7                                            | 863.4 | 1133.2 |
| Pyr_ex         | Pyrcyt-->PyrEx               | 61.7                                    | -      | -      | 57.8                                             | -     | -      |
| Ala_ex         | Ala-->AlaEx                  | 17.1                                    | -      | -      | 19.4                                             | -     | -      |
| Pro_ex         | Pro-->ProEx                  | 13.9                                    | -      | -      | 1.5                                              | -     | -      |
| Cit_Dummy      | Cit-->Citdummy               | 100.0                                   | -      | -      | 100.0                                            | -     | -      |
| Pyr_Dummy      | Pyr-->Pyrdummy               | 100.0                                   | -      | -      | 100.0                                            | -     | -      |
| aKG_Dummy      | aKG-->aKGdummy               | 100.0                                   | -      | -      | 100.0                                            | -     | -      |
| Glycolysis_r1  | G6P-->F6P                    | 539.6                                   | -      | -      | 488.7                                            | -     | -      |
| Glycolysis_r1r | F6P-->G6P                    | 0.0                                     | -      | -      | 0.0                                              | -     | -      |
| Glycolysis_r2  | F6P-->FBP                    | 578.9                                   | 527.6  | 633.6  | 531.6                                            | 490.5 | 581.9  |
| Glycolysis_r3  | FBP-->DHAP+GAP               | 685.3                                   | -      | -      | 8053.1                                           | -     | -      |
| Glycolysis_r3r | DHAP+GAP-->FBP               | 106.4                                   | -      | -      | 7521.5                                           | -     | -      |
| Glycolysis_r4  | DHAP-->GAP                   | 49402.3                                 | -      | -      | 207737.2                                         | -     | -      |
| Glycolysis_r4r | GAP-->DHAP                   | 48825.6                                 | -      | -      | 207206.8                                         | -     | -      |
| Glycolysis_r5  | GAP-->PGA                    | 1175.3                                  | -      | -      | 2953.6                                           | -     | -      |
| Glycolysis_r5r | PGA-->GAP                    | 0.0                                     | -      | -      | 1870.1                                           | -     | -      |
| Glycolysis_r6  | PGA-->PEP                    | 1205.5                                  | -      | -      | 2969.4                                           | -     | -      |
| Glycolysis_r6r | PEP-->PGA                    | 33.0                                    | -      | -      | 1888.1                                           | -     | -      |
| Glycolysis_r7  | PEP-->Pyrcyt                 | 1172.4                                  | 1071.5 | 1281.9 | 1081.4                                           | 999.6 | 1182.5 |
| Glycolysis_r8  | Pyrcyt-->Lac                 | 1044.5                                  | 942.8  | 1153.8 | 983.7                                            | 901.8 | 1084.9 |
| TCA_r1         | Pyrcyt-->Pyrmit              | 108.6                                   | 88.3   | 117.1  | 57.8                                             | 54.7  | 75.8   |
| TCA_r2         | Pyrmit--<br>>AcCOAmit+CO2in  | 80.1                                    | 74.5   | 87.5   | 53.1                                             | 49.9  | 56.3   |
| TCA_r3         | AcCOAmit+Oxamit--<br>>Citmit | 80.1                                    | 74.2   | 87.3   | 53.1                                             | 49.8  | 56.3   |
| TCA_r4         | Citmit-->aKGmit+CO2in        | 46.8                                    | -      | -      | 34.4                                             | -     | -      |

|                 |                       |          |      |      |         |      |       |
|-----------------|-----------------------|----------|------|------|---------|------|-------|
| TCA_r4r         | aKGmit+CO2in-->Citmit | 0.0      | -    | -    | 0.0     | -    | -     |
| TCA_r5          | aKGmit-->Suc+CO2in    | 89.6     | 83.7 | 97.0 | 72.7    | 69.4 | 75.9  |
| TCA_r6          | Suc-->Fum             | 23194.0  | -    | -    | 412.9   | -    | -     |
| TCA_r6r         | Fum-->Suc             | 23104.4  | -    | -    | 340.2   | -    | -     |
| TCA_r7          | Fum-->Mal             | 194650.0 | -    | -    | 89.6    | -    | -     |
| TCA_r7r         | Mal-->Fum             | 194560.3 | -    | -    | 16.9    | -    | -     |
| TCA_r8          | Mal-->Oxamit          | 446715.0 | -    | -    | 180.7   | -    | -     |
| TCA_r8r         | Oxamit-->Mal          | 446640.5 | -    | -    | 137.1   | -    | -     |
| Anaplerosis_r1  | Pyrim2+CO2in-->Oxamit | 17.0     | 12.4 | 27.4 | 16.3    | 13.1 | 20.2  |
| Anaplerosis_r2  | Mal-->Pyrim2+CO2in    | 13.8     | 4.5  | 27.3 | 11.7    | 7.3  | 16.7  |
| Anaplerosis_r3  | Mal-->Pyrcyt+CO2in    | 44.7     | 38.8 | 50.4 | 43.6    | 39.7 | 47.3  |
| Anaplerosis_r4  | Pyrim-->Pyrim2        | 59.0     | -    | -    | 33.2    | -    | -     |
| Anaplerosis_r4r | Pyrim2-->Pyrim        | 55.8     | -    | -    | 28.6    | -    | -     |
| PPP_r1          | G6P-->Ru5P+CO2in      | 62.9     | 20.4 | 92.4 | 66.9    | 24.7 | 106.3 |
| PPP_r2          | Ru5P-->R5P            | 24.6     | -    | -    | 5431.5  | -    | -     |
| PPP_r2r         | R5P-->Ru5P            | 0.8      | -    | -    | 5407.5  | -    | -     |
| PPP_r3          | Ru5P-->Xu5P           | 9207.6   | -    | -    | 26407.5 | -    | -     |
| PPP_r3r         | Xu5P-->Ru5P           | 9168.4   | -    | -    | 26364.5 | -    | -     |
| PPP_r4          | R5P+Xu5P-->S7P+GAP    | 19.6     | -    | -    | 21.5    | -    | -     |
| PPP_r4r         | GAP+S7P-->Xu5P+R5P    | 0.0      | -    | -    | 0.0     | -    | -     |
| PPP_r5          | GAP+S7P-->F6P+E4P     | 273.3    | -    | -    | 14761.8 | -    | -     |
| PPP_r5r         | E4P+F6P-->S7P+GAP     | 253.6    | -    | -    | 14740.3 | -    | -     |
| PPP_r6          | E4P+Xu5P-->F6P+GAP    | 53.6     | -    | -    | 49.1    | -    | -     |
| PPP_r6r         | GAP+F6P-->Xu5P+E4P    | 34.0     | -    | -    | 27.7    | -    | -     |
| AA_r1           | Gln-->Glu             | 77.0     | -    | -    | 49.2    | -    | -     |
| AA_r2           | Glu-->aKGmit          | 9035.8   | -    | -    | 1998.0  | -    | -     |
| AA_r2r          | aKGmit-->Glu          | 8982.9   | -    | -    | 1952.1  | -    | -     |
| AA_r3           | Glu-->Pro             | 17.9     | 17.5 | 18.3 | 2.8     | 2.7  | 2.9   |
| AA_r4           | Oxamit-->Asp          | 11.4     | -    | -    | 6.9     | -    | -     |
| AA_r5           | Asp-->Asn             | 5.1      | -    | -    | 3.1     | -    | -     |
| AA_r6           | Ser-->Gly             | 18.9     | -    | -    | 15.6    | -    | -     |
| AA_r7           | Gly-->GlyDeg          | 9.4      | -    | -    | 9.8     | -    | -     |
| AA_r8           | PGA-->Ser             | 2.8      | -    | -    | 2.1     | -    | -     |
| AA_r8r          | Ser-->PGA             | 0.0      | -    | -    | 0.0     | -    | -     |
| AA_r9           | Arg-->Glu             | 0.6      | 0.2  | 1.0  | 3.6     | 3.5  | 3.7   |

|                |                                                                                                                                                                                                    |         |        |        |          |        |        |
|----------------|----------------------------------------------------------------------------------------------------------------------------------------------------------------------------------------------------|---------|--------|--------|----------|--------|--------|
| AA_r10         | Cys-->Ser                                                                                                                                                                                          | 1.6     | -      | -      | 1.8      | -      | -      |
| AA_r11         | Arg-->Pro                                                                                                                                                                                          | 1.5     | 1.1    | 1.9    | 2.0      | 1.9    | 2.1    |
| AA_r12         | Pyrmit-->Ala                                                                                                                                                                                       | 25.3    | -      | -      | 0.0      | -      | -      |
| AA_r13         | Pyrcyt-->Ala                                                                                                                                                                                       | 2.4     | -      | -      | 25.8     | -      | -      |
| Cyt_r1         | Citcyt--<br>>AcCOAcyt+Oxacyt                                                                                                                                                                       | 43.4    | -      | -      | 26.3     | -      | -      |
| Cyt_r2         | Mal-->Oxacyt                                                                                                                                                                                       | 18112.5 | -      | -      | 499.1    | -      | -      |
| Cyt_r2r        | Oxacyt-->Mal                                                                                                                                                                                       | 18155.9 | -      | -      | 525.4    | -      | -      |
| Cyt_r3         | Citmit-->Citcyt                                                                                                                                                                                    | 33.3    | -      | -      | 18.7     | -      | -      |
| Cyt_r4         | aKGmit-->aKGcyt                                                                                                                                                                                    | 10.1    | 1.4    | 14.7   | 7.7      | 2.4    | 10.3   |
| Cyt_r5         | aKGcyt+CO2in-->Citcyt                                                                                                                                                                              | 10.1    | 1.4    | 14.7   | 7.7      | 2.3    | 10.3   |
| BIOMASS        | {308.4}Ala+{193.8}Arg+{<br>184.5}Asp+{148}Asn+{74.<br>5}Cys+{165.5}Gln+{198.4<br>}Glu+{276.5}Gly+{160.9}<br>Pro+{221.0}Ser+{1265.6}<br>AcCOAcyt+{143.1}G6P+{<br>119.4}R5P+{61.2}DHAP<br>-->Biomass | 0.034   | -      | -      | 0.021    | -      | -      |
| CO2            | CO2in-->CO2Ex                                                                                                                                                                                      | 9180.1  | -      | -      | 369445.1 | -      | -      |
| Mix_r1         | {0}Citmit-->Cit                                                                                                                                                                                    | 83.0    | -      | -      | 69.9     | -      | -      |
| Mix_r2         | {0}Citcyt-->Cit                                                                                                                                                                                    | 17.0    | -      | -      | 30.1     | -      | -      |
| Mix_r3         | {0}Pyrmit-->Pyr                                                                                                                                                                                    | 0.0     | -      | -      | 0.0      | -      | -      |
| Mix_r4         | {0}Pyrmit2-->Pyr                                                                                                                                                                                   | 0.0     | -      | -      | 0.0      | -      | -      |
| Mix_r5         | {0}Pyrcyt-->Pyr                                                                                                                                                                                    | 100.0   | -      | -      | 100.0    | -      | -      |
| Mix_r6         | {0}aKGmit-->aKG                                                                                                                                                                                    | 41.4    | -      | -      | 49.4     | -      | -      |
| Mix_r7         | {0}aKGcyt-->aKG                                                                                                                                                                                    | 58.6    | -      | -      | 50.6     | -      | -      |
| PEPH           | Glycolysis_r6<=>Glycolysi<br>s_r6r                                                                                                                                                                 | 1172.4  | 1073.2 | 1281.8 | 1081.4   | 999.6  | 1182.5 |
| MDH            | TCA_r8<=>TCA_r8r                                                                                                                                                                                   | 74.5    | 67.6   | 80.4   | 43.7     | 38.9   | 48.1   |
| TKT2           | PPP_r6<=>PPP_r6r                                                                                                                                                                                   | 19.6    | 5.4    | 29.4   | 21.5     | 7.4    | 34.6   |
| TKT1           | PPP_r4<=>PPP_r4r                                                                                                                                                                                   | 19.6    | 5.5    | 29.4   | 21.5     | 7.4    | 34.6   |
| PyrmitExchange | Anaplerosis_r4<=>Anapler<br>osis_r4r                                                                                                                                                               | 3.2     | -2.8   | 8.9    | 4.6      | 0.7    | 8.2    |
| GAPDH          | Glycolysis_r5<=>Glycolysi                                                                                                                                                                          | 1175.3  | 1075.4 | 1281.4 | 1083.5   | 1001.9 | 1184.6 |

|         |                                    |       |       |       |       |       |       |
|---------|------------------------------------|-------|-------|-------|-------|-------|-------|
|         | s_r5r                              |       |       |       |       |       |       |
| TPI     | Glycolysis_r4<=>Glycolysi<br>s_r4r | 576.8 | 526.3 | 631.8 | 530.4 | 489.2 | 580.6 |
| PGI     | Glycolysis_r1<=>Glycolysi<br>s_r1r | 539.6 | 474.1 | 613.7 | 488.7 | 437.0 | 551.7 |
| TAL     | PPP_r5<=>PPP_r5r                   | 19.6  | 5.4   | 29.4  | 21.5  | 7.4   | 34.6  |
| FBA     | Glycolysis_r3<=>Glycolysi<br>s_r3r | 578.9 | 527.5 | 632.5 | 531.6 | 490.5 | 581.9 |
| IDH     | TCA_r4<=>TCA_r4r                   | 46.8  | 43.2  | 50.5  | 34.4  | 29.5  | 37.2  |
| GLUDH   | AA_r2<=>AA_r2r                     | 52.9  | -     | -     | 45.9  | -     | -     |
| RPI     | PPP_r2<=>PPP_r2r                   | 23.7  | 9.5   | 33.5  | 24.0  | 9.9   | 37.1  |
| MDHcyt  | Cyt_r2<=>Cyt_r2r                   | -43.4 | -     | -     | -26.3 | -     | -     |
| RBE     | PPP_r3<=>PPP_r3r                   | 39.2  | 10.9  | 58.9  | 42.9  | 14.8  | 69.2  |
| SDH     | TCA_r6<=>TCA_r6r                   | 89.6  | 83.7  | 97.0  | 72.7  | 69.4  | 75.9  |
| FH      | TCA_r7<=>TCA_r7r                   | 89.6  | 83.7  | 97.0  | 72.7  | 69.4  | 75.9  |
| PGAtSer | AA_r8<=>AA_r8r                     | 2.8   | -     | -     | 2.1   | -     | -     |

**Supplemental Table S2**

| <b>Metabolites</b>            | <b><i>m/z</i></b> | <b>Chemical formula</b>                                                       |
|-------------------------------|-------------------|-------------------------------------------------------------------------------|
| <b>MTBSTFA derivatisation</b> |                   |                                                                               |
| Pyruvate                      | 174               | C <sub>6</sub> H <sub>12</sub> O <sub>3</sub> NSi                             |
| Lactate                       | 261               | C <sub>11</sub> H <sub>25</sub> O <sub>3</sub> Si <sub>2</sub>                |
| Alanine                       | 260               | C <sub>11</sub> H <sub>26</sub> O <sub>2</sub> NSi <sub>2</sub>               |
| Glycine                       | 246               | C <sub>10</sub> H <sub>24</sub> O <sub>2</sub> Si <sub>2</sub>                |
| Glycine                       | 218               | C <sub>9</sub> H <sub>24</sub> O <sub>1</sub> Si <sub>2</sub>                 |
| Lactate                       | 261               | C <sub>11</sub> H <sub>25</sub> O <sub>3</sub> Si <sub>2</sub>                |
| Fumarate                      | 287               | C <sub>12</sub> H <sub>23</sub> O <sub>4</sub> Si <sub>2</sub>                |
| $\alpha$ -Ketoglutarate       | 346               | C <sub>14</sub> H <sub>28</sub> O <sub>5</sub> N <sub>1</sub> Si <sub>2</sub> |
| Malate                        | 419               | C <sub>18</sub> H <sub>39</sub> O <sub>5</sub> Si <sub>3</sub>                |
| Phosphoenolpyruvate           | 453               | C <sub>17</sub> H <sub>38</sub> O <sub>6</sub> Si <sub>3</sub> P <sub>1</sub> |
| Citrate                       | 459               | C <sub>20</sub> H <sub>39</sub> O <sub>6</sub> Si <sub>3</sub>                |
| 3-Phosphoglycerate            | 585               | C <sub>23</sub> H <sub>54</sub> O <sub>7</sub> Si <sub>4</sub> P <sub>1</sub> |
| Proline                       | 286               | C <sub>13</sub> H <sub>28</sub> O <sub>2</sub> N <sub>1</sub> Si <sub>2</sub> |
| Proline                       | 184               | C <sub>10</sub> H <sub>22</sub> N <sub>1</sub> Si <sub>1</sub>                |
| Aspartate                     | 418               | C <sub>18</sub> H <sub>40</sub> O <sub>4</sub> N <sub>1</sub> Si <sub>3</sub> |
| Aspartate                     | 390               | C <sub>17</sub> H <sub>40</sub> O <sub>3</sub> N <sub>1</sub> Si <sub>3</sub> |
| Glutamate                     | 432               | C <sub>19</sub> H <sub>42</sub> O <sub>4</sub> N <sub>1</sub> Si <sub>3</sub> |
| Glutamate                     | 330               | C <sub>16</sub> H <sub>36</sub> O <sub>2</sub> N <sub>1</sub> Si <sub>2</sub> |
| <b>MSTFA derivatisation</b>   |                   |                                                                               |
| Fumarate                      | 245               | C <sub>9</sub> H <sub>17</sub> O <sub>4</sub> Si <sub>2</sub>                 |



**Supplemental Table S3**

| <sup>13</sup> C carbon source | Metabolite Name | m/z | Mass  | Parental |           | FH <sup>dim</sup> |           |
|-------------------------------|-----------------|-----|-------|----------|-----------|-------------------|-----------|
|                               |                 |     |       | Measured | Simulated | Measured          | Simulated |
|                               |                 |     |       | MIDs     | MIDs      | MIDs              | MIDs      |
| [1,2- <sup>13</sup> C]Glucose | 3PG             | 585 | M+0   | 0.514    | 0.497     | 0.515             | 0.492     |
|                               |                 |     | M+1   | 0.025    | 0.026     | 0.027             | 0.038     |
|                               |                 |     | M+2   | 0.454    | 0.471     | 0.451             | 0.468     |
|                               |                 |     | M+3   | 0.007    | 0.006     | 0.007             | 0.003     |
|                               | Ala             | 260 | M+0   | 0.541    | 0.544     | 0.524             | 0.519     |
|                               |                 |     | M+1   | 0.035    | 0.032     | 0.031             | 0.037     |
|                               |                 |     | M+2   | 0.416    | 0.418     | 0.438             | 0.439     |
|                               |                 |     | M+3   | 0.008    | 0.006     | 0.007             | 0.006     |
|                               | Gly             | 218 | M+0   | 0.943    | 0.940     | 0.944             | 0.941     |
|                               |                 |     | M+1   | 0.057    | 0.060     | 0.056             | 0.059     |
|                               | Gly             | 246 | M+0   | 0.931    | 0.932     | 0.933             | 0.934     |
|                               |                 |     | M+1   | 0.068    | 0.063     | 0.066             | 0.061     |
|                               |                 |     | M+2   | 0.001    | 0.005     | 0.001             | 0.005     |
|                               | Lac             | 261 | M+0   | 0.522    | 0.525     | 0.524             | 0.532     |
|                               |                 |     | M+1   | 0.028    | 0.033     | 0.031             | 0.033     |
|                               |                 |     | M+2   | 0.442    | 0.434     | 0.438             | 0.429     |
|                               |                 |     | M+3   | 0.007    | 0.008     | 0.007             | 0.007     |
|                               | PEP             | 453 | M+0   | 0.514    | 0.508     | 0.515             | 0.503     |
|                               |                 |     | M+1   | 0.025    | 0.028     | 0.027             | 0.035     |
|                               |                 |     | M+2   | 0.454    | 0.458     | 0.451             | 0.461     |
| M+3                           |                 |     | 0.007 | 0.005    | 0.007     | 0.002             |           |
| Pyr                           | 174             | M+0 | 0.522 | 0.532    | 0.524     | 0.530             |           |
|                               |                 | M+1 | 0.028 | 0.033    | 0.031     | 0.034             |           |
|                               |                 | M+2 | 0.442 | 0.430    | 0.438     | 0.432             |           |
|                               |                 | M+3 | 0.007 | 0.004    | 0.007     | 0.004             |           |
| [U- <sup>13</sup> C]Glutamine | AKG             | 346 | M+0   | 0.083    | 0.080     | 0.148             | 0.135     |
|                               |                 |     | M+1   | 0.049    | 0.049     | 0.052             | 0.053     |
|                               |                 |     | M+2   | 0.054    | 0.050     | 0.054             | 0.055     |
|                               |                 |     | M+3   | 0.182    | 0.177     | 0.166             | 0.168     |
|                               |                 |     | M+4   | 0.012    | 0.027     | 0.013             | 0.025     |
|                               |                 |     | M+5   | 0.620    | 0.616     | 0.567             | 0.564     |

|     |     |     |       |       |       |       |
|-----|-----|-----|-------|-------|-------|-------|
| Asp | 390 | M+0 | 0.198 | 0.189 | 0.284 | 0.293 |
|     |     | M+1 | 0.136 | 0.135 | 0.130 | 0.129 |
|     |     | M+2 | 0.138 | 0.137 | 0.124 | 0.121 |
|     |     | M+3 | 0.527 | 0.539 | 0.462 | 0.457 |
|     |     | M+0 | 0.182 | 0.180 | 0.268 | 0.266 |
|     |     | M+1 | 0.072 | 0.075 | 0.072 | 0.076 |
|     |     | M+2 | 0.166 | 0.165 | 0.151 | 0.148 |
|     |     | M+3 | 0.101 | 0.102 | 0.102 | 0.103 |
|     |     | M+4 | 0.479 | 0.477 | 0.407 | 0.407 |
| Cit | 459 | M+0 | 0.158 | 0.161 | 0.226 | 0.237 |
|     |     | M+1 | 0.070 | 0.077 | 0.073 | 0.076 |
|     |     | M+2 | 0.159 | 0.160 | 0.147 | 0.145 |
|     |     | M+3 | 0.105 | 0.105 | 0.108 | 0.111 |
|     |     | M+4 | 0.424 | 0.430 | 0.341 | 0.345 |
|     |     | M+5 | 0.051 | 0.056 | 0.074 | 0.077 |
|     |     | M+6 | 0.033 | 0.012 | 0.030 | 0.008 |
| Fum | 287 | M+0 | 0.182 | 0.198 | 0.168 | 0.164 |
|     |     | M+1 | 0.072 | 0.069 | 0.072 | 0.082 |
|     |     | M+2 | 0.166 | 0.164 | 0.184 | 0.178 |
|     |     | M+3 | 0.101 | 0.104 | 0.031 | 0.032 |
|     |     | M+4 | 0.480 | 0.465 | 0.545 | 0.544 |
| Glu | 330 | M+0 | 0.088 | 0.093 | 0.152 | 0.141 |
|     |     | M+1 | 0.072 | 0.076 | 0.071 | 0.076 |
|     |     | M+2 | 0.201 | 0.193 | 0.184 | 0.186 |
|     |     | M+3 | 0.015 | 0.027 | 0.015 | 0.025 |
|     |     | M+4 | 0.624 | 0.612 | 0.577 | 0.572 |
| Glu | 432 | M+0 | 0.083 | 0.086 | 0.147 | 0.127 |
|     |     | M+1 | 0.049 | 0.051 | 0.051 | 0.051 |
|     |     | M+2 | 0.053 | 0.049 | 0.053 | 0.048 |
|     |     | M+3 | 0.180 | 0.175 | 0.161 | 0.164 |
|     |     | M+4 | 0.012 | 0.027 | 0.012 | 0.027 |
|     |     | M+5 | 0.623 | 0.612 | 0.576 | 0.583 |
| Lac | 261 | M+0 | 0.940 | 0.949 | 0.940 | 0.957 |
|     |     | M+1 | 0.035 | 0.031 | 0.035 | 0.029 |
|     |     | M+2 | 0.005 | 0.007 | 0.006 | 0.003 |

|     |     |     |       |       |       |       |
|-----|-----|-----|-------|-------|-------|-------|
|     |     | M+3 | 0.019 | 0.012 | 0.018 | 0.011 |
| Mal | 419 | M+0 | 0.182 | 0.169 | 0.229 | 0.232 |
|     |     | M+1 | 0.072 | 0.073 | 0.072 | 0.070 |
|     |     | M+2 | 0.166 | 0.159 | 0.159 | 0.151 |
|     |     | M+3 | 0.101 | 0.104 | 0.096 | 0.099 |
|     |     | M+4 | 0.479 | 0.495 | 0.444 | 0.448 |
| Pro | 184 | M+0 | 0.154 | 0.158 | 0.485 | 0.484 |
|     |     | M+1 | 0.069 | 0.065 | 0.059 | 0.057 |
|     |     | M+2 | 0.186 | 0.176 | 0.109 | 0.106 |
|     |     | M+3 | 0.014 | 0.027 | 0.009 | 0.016 |
|     |     | M+4 | 0.577 | 0.574 | 0.339 | 0.337 |
| Pro | 286 | M+0 | 0.148 | 0.149 | 0.477 | 0.470 |
|     |     | M+1 | 0.049 | 0.046 | 0.051 | 0.052 |
|     |     | M+2 | 0.049 | 0.042 | 0.031 | 0.030 |
|     |     | M+3 | 0.167 | 0.151 | 0.095 | 0.099 |
|     |     | M+4 | 0.011 | 0.029 | 0.007 | 0.018 |
|     |     | M+5 | 0.576 | 0.584 | 0.338 | 0.332 |
| Pyr | 174 | M+0 | 0.940 | 0.946 | 0.940 | 0.953 |
|     |     | M+1 | 0.035 | 0.034 | 0.035 | 0.031 |
|     |     | M+2 | 0.005 | 0.007 | 0.006 | 0.005 |
|     |     | M+3 | 0.019 | 0.013 | 0.018 | 0.012 |

**Supplemental Table S4**

| Type                                 | Reaction name   | Stoichiometry                                          | Parental<br>(nmol/10 <sup>6</sup> cells/h) | FH <sup>dim</sup><br>(nmol/10 <sup>6</sup> cells/h) |
|--------------------------------------|-----------------|--------------------------------------------------------|--------------------------------------------|-----------------------------------------------------|
| NADPH production<br>flux             | OxPPP           | G6P + NADP --> Ru5P + CO2in + NADPH                    | 62.9                                       | 66.9                                                |
|                                      | MEcyt           | Mal + NADP --> Pyrcyt + CO2in + NADPH                  | 44.7                                       | 43.6                                                |
|                                      | One_carbon_1    | Ser + 2 NADP --> Gly + 2 NADPH                         | 37.8                                       | 31.1                                                |
|                                      | One_carbon_2    | Gly + 2 NADP --> GlyDeg + 2 NADPH                      | 18.8                                       | 19.6                                                |
|                                      | Sum             |                                                        | 164.2                                      | 161.3                                               |
| NADPH<br>consumption flux            | Lipid synthesis | AcCOAcyt + 1.85 NADPH --> Lipid_BIOMASS + 1.85<br>NADP | 80.3                                       | 48.7                                                |
|                                      | IDHcyt          | aKGcyt+CO2in + NADPH --> Citcyt + NADP                 | 10.1                                       | 7.7                                                 |
|                                      | Pro_synthesis_1 | Glu + 2 NADPH --> Pro + 2 NADP                         | 35.8                                       | 5.6                                                 |
|                                      | Pro_synthesis_2 | Arg + NADPH --> Pro + NADP                             | 1.5                                        | 2.0                                                 |
|                                      | Sum             |                                                        | 127.7                                      | 64.0                                                |
| <b>Net NADPH<br/>production flux</b> |                 |                                                        | <b>36.5</b>                                | <b>97.3</b>                                         |

**Supplemental Table S5**

| Type                                | Reaction name   | Pathway    | Stoichiometry                                        | Parental<br>(nmol/10 <sup>6</sup> cells/h) | FH <sup>dim</sup><br>(nmol/10 <sup>6</sup> cells/h) |
|-------------------------------------|-----------------|------------|------------------------------------------------------|--------------------------------------------|-----------------------------------------------------|
| NADH production<br>flux             | PDH             | TCA cycle  | Pyrim + NAD --> AcCoAmit + CO <sub>2</sub> in + NADH | 80.1                                       | 53.1                                                |
|                                     | aKGDH           | TCA cycle  | aKGmit + NAD --> Suc + CO <sub>2</sub> in + NADH     | 89.6                                       | 72.7                                                |
|                                     | MEmit           | Others     | Mal + NAD --> Pyrim2 + CO <sub>2</sub> in + NADH     | 13.8                                       | 11.7                                                |
|                                     | MDHmit          | TCA cycle  | Mal + NAD --> Oxamit + NADH                          | 74.5                                       | 43.7                                                |
|                                     | GAPDH           | Glycolysis | GAP + NAD --> PGA + NADH                             | 1175.3                                     | 1083.5                                              |
|                                     | IDHmit          | TCA cycle  | Citmit + NAD --> aKGmit + CO <sub>2</sub> in + NADH  | 46.8                                       | 34.4                                                |
|                                     | SDH             | TCA cycle  | Suc + 0.6 NAD --> Fum + 0.6 NADH                     | 53.8                                       | 43.6                                                |
|                                     | Sum             |            |                                                      | 1533.9                                     | 1342.7                                              |
| NADH<br>consumption flux            | LDH             | Glycolysis | Pyrcyt + NADH --> Lac + NAD                          | 1044.5                                     | 983.7                                               |
|                                     | MDHcyt          | Others     | Oxacyt + NADH --> Mal + NAD                          | 43.4                                       | 26.3                                                |
|                                     | Pro_synthesis_1 | Others     | Glu + NADH --> Pro + NAD                             | 17.9                                       | 2.8                                                 |
|                                     | Pro_synthesis_2 | Others     | Arg + NADH --> Glu + NAD                             | 1.5                                        | 2.0                                                 |
|                                     |                 | Sum        |                                                      |                                            | 1107.3                                              |
| <b>Net NADH<br/>production flux</b> |                 |            |                                                      | <b>426.6</b>                               | <b>327.9</b>                                        |

**Supplemental Table S6**

| Type                               | Reaction name | Pathway    | Stoichiometry                         | Parental<br>(nmol/10 <sup>6</sup> cells/h) | FH <sup>dim</sup><br>(nmol/10 <sup>6</sup> cells/h) |
|------------------------------------|---------------|------------|---------------------------------------|--------------------------------------------|-----------------------------------------------------|
| ATP production<br>flux             | GAPDH         | Glycolysis | GAP + ADP --> PGA + ATP               | 1175.3                                     | 1083.5                                              |
|                                    | aKGDH         | TCA cycle  | aKGmit + ADP --> Suc + CO2in + ATP    | 89.6                                       | 72.7                                                |
|                                    | PK            | Glycolysis | PEP + ADP --> Pyreyt + ATP            | 1172.4                                     | 1081.4                                              |
|                                    | OXPHOS        | TCA cycle  | NADH --> 2.3 ATP                      | 981.3                                      | 754.1                                               |
|                                    | Sum           |            | 3418.6                                | 2991.7                                     |                                                     |
| ATP consumption<br>flux            | HK            | Glycolysis | SubsGlc + ATP --> G6P + ADP           | 607.5                                      | 558.6                                               |
|                                    | PFK           | Glycolysis | F6P + ATP --> FBP + ADP               | 578.9                                      | 531.6                                               |
|                                    | PC            | Others     | Pyrim2 + CO2in + ATP --> Oxamit + ADP | 17.0                                       | 16.3                                                |
|                                    | Sum           |            | 1203.3                                | 1106.5                                     |                                                     |
| <b>Net ATP<br/>production flux</b> |               |            |                                       | <b>2215.3</b>                              | <b>1885.1</b>                                       |
